# Supplementary material for: Red Blood Cell Distribution Width Is Associated with Deterioration of Renal Function and Cardiovascular Morbidity and Mortality in Patients with Diabetic Kidney Disease
Source: MDPI journal article supplement (doi:10.3390/life10110301), 2020-11-22

## Supplementary Files

# Red Blood Cell Distribution Width is Associated with Deterioration of Renal Function and Cardiovascular Morbidity and Mortality in Patients with Diabetic Kidney Disease

Stefanos Roumeliotis <sup>1,\*</sup>, Aikaterini Stamou <sup>2</sup>, Athanasios Roumeliotis <sup>1</sup>, Marios Theodoridis <sup>3</sup>, Konstantinos Leivaditis <sup>1</sup>, Stylianos Panagoutsos <sup>3</sup> and Vassilios Liakopoulos <sup>1</sup>

### Supplementary Tables

**Table S1.** Multiple regression analysis (stepwise forward) in 142 type 2 diabetes patients with cIMT as the dependent variable, adjusting for HD.

|                                       | $\beta$ | SE    | p            | CI          |
|---------------------------------------|---------|-------|--------------|-------------|
| <b>Model 1 (unadjusted)</b>           |         |       |              |             |
| Age                                   | 0.008   | 0.03  | <b>0.006</b> | 0.002–0.013 |
| <b>Model 2 (adjusted)<sup>a</sup></b> |         |       |              |             |
| Age                                   | 0.008   | 0.03  | <b>0.003</b> | 0.003–0.014 |
| RDW                                   | 0.029   | 0.013 | <b>0.029</b> | 0.003–0.054 |
| BMI                                   | 0.010   | 0.005 | <b>0.031</b> | 0.001–0.02  |

<sup>a</sup>Adjusted for age, sex, diastolic/systolic blood pressure, Body Mass Index, duration of type 2 diabetes mellitus, triglycerides, total cholesterol, Glycated Hemoglobin A1c, C-Reactive Protein, Estimated Glomerular Filtration Rate, Urinary Albumin-Creatinine Ratio, Red Blood Cell Distribution Width. SE, Standard Error; CI, Confidence Interval.

**Table S2.** Multiple regression analysis (stepwise forward) in 142 type 2 diabetes patients with RDW as the dependent variable, adjusting for HD.

|                                       | $\beta$ | SE   | p                | CI             |
|---------------------------------------|---------|------|------------------|----------------|
| <b>Model 1 (unadjusted)</b>           |         |      |                  |                |
| Hb                                    | −0.46   | 0.10 | <b>&lt;0.001</b> | −0.67 to −0.26 |
| <b>Model 2 (adjusted)<sup>a</sup></b> |         |      |                  |                |
| Hb                                    | −0.40   | 0.10 | <b>&lt;0.001</b> | −0.60 to −0.19 |
| UPCR                                  | 0.27    | 0.10 | <b>0.011</b>     | 0.06–0.47      |
| cIMT                                  | 1.54    | 0.64 | <b>0.019</b>     | 0.26–2.82      |

<sup>a</sup>Adjusted for hemoglobin, urinary protein to creatinine ratio, carotid intima media thickness, diastolic blood pressure, duration of type 2 diabetes mellitus, Serum Albumin, C-Reactive Protein, Estimated Glomerular Filtration Rate. SE, Standard Error; CI, Confidence Interval.

## Supplementary Figures

**Figure S1.** All-cause mortality in (A) Controls, (B) CKD stages1-4 and (C) Hemodialysis.

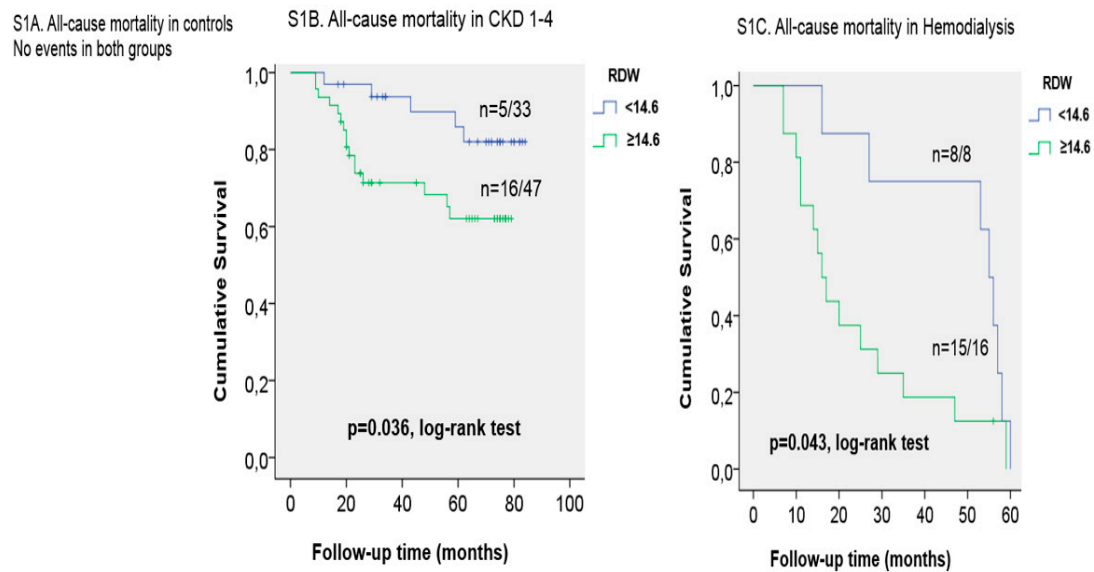

**Figure S2.** Cardiovascular mortality in (A) Controls, (B) CKD stages1-4 and (C) Hemodialysis.

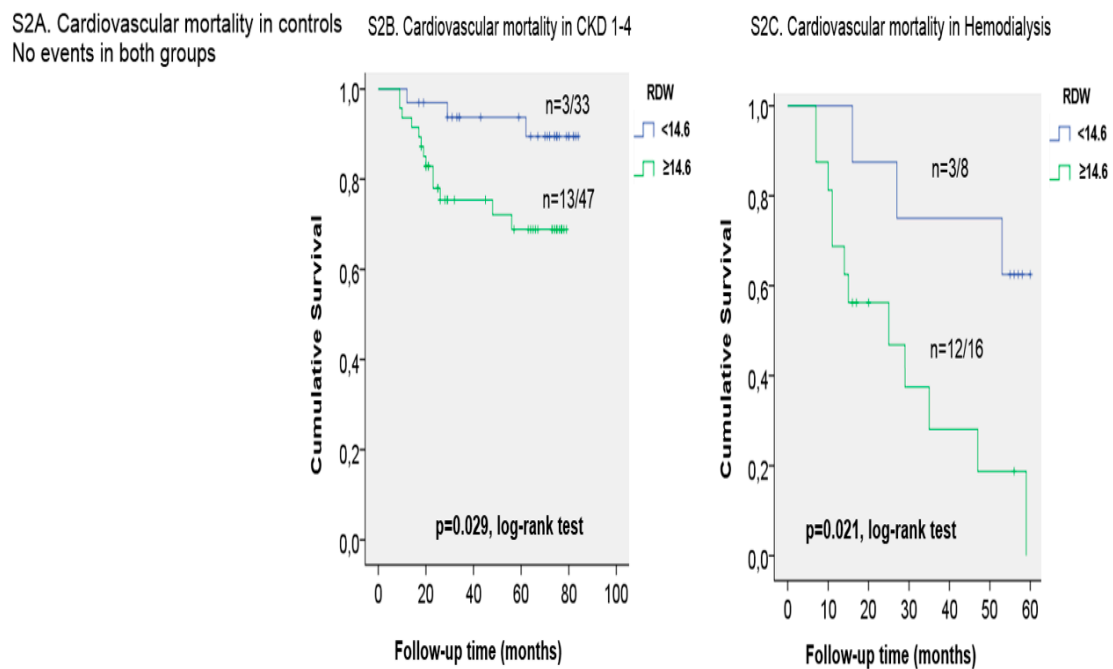

**Figure S3.** Cardiovascular events in (A) Controls, (B) CKD stages1-4 and (C) Hemodialysis.

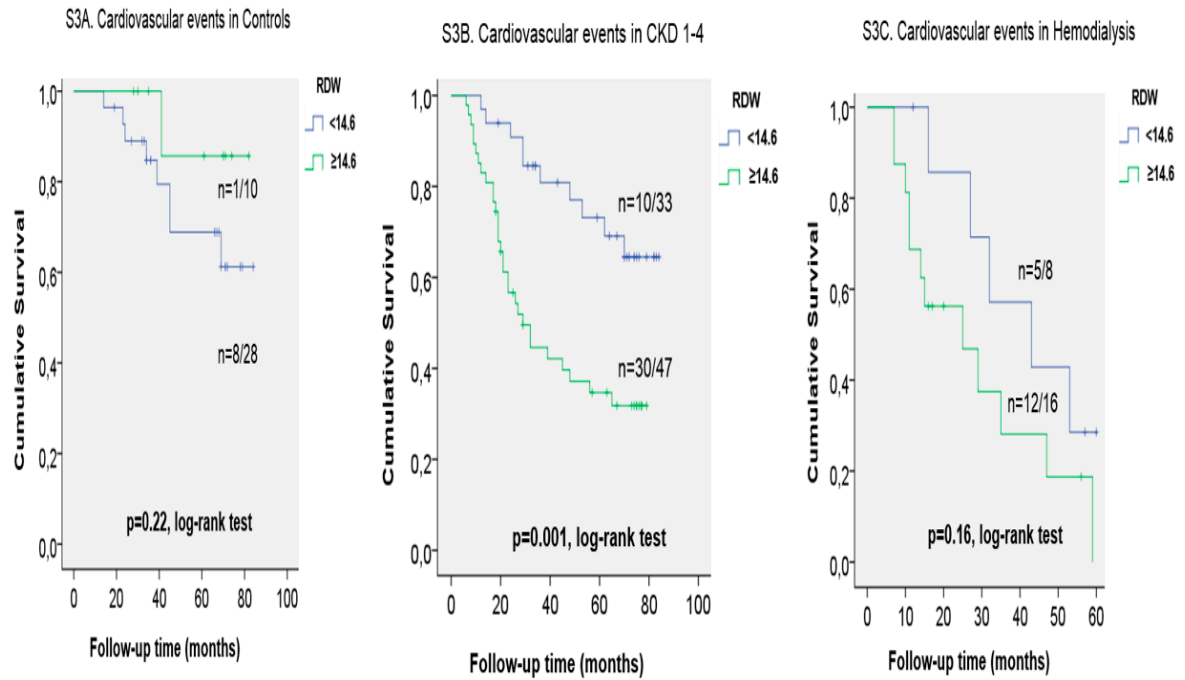

**Figure S4.** Progression to ESRD in (A) Controls, (B) CKD stages1-4 and (C) Hemodialysis.

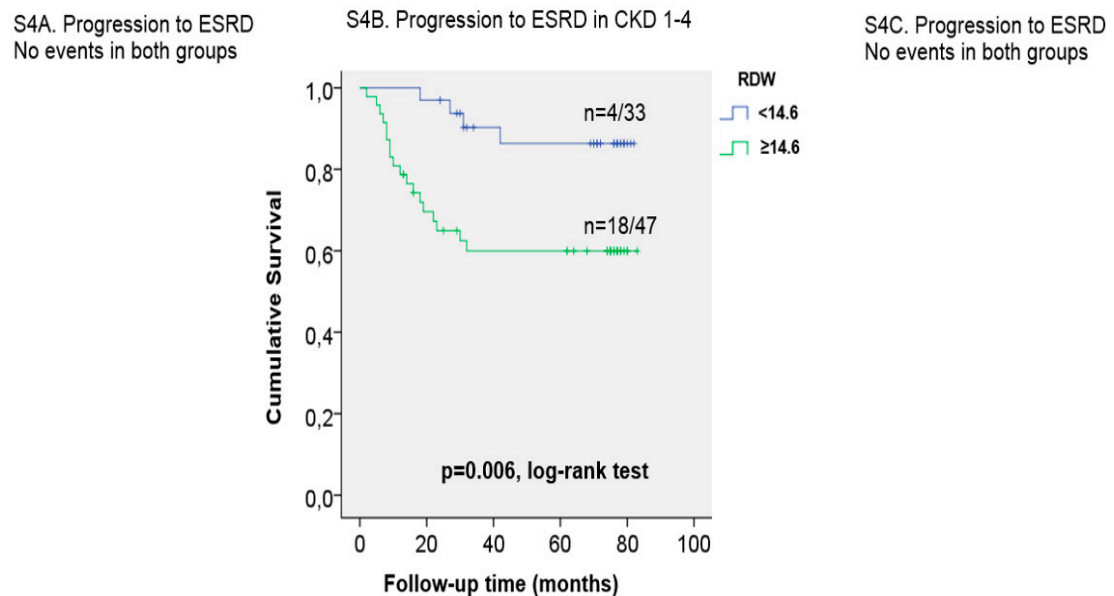

Supplement: s1 [file s1]
